# Supplementary material for: Fabricating CdS/Ag/BiVO4 Z-heterojunction for solvent-free photocatalytic oxidation of amines
Source: Royal Society of Chemistry journal article supplement (doi:10.1039/d3gc04644c), 2024-01-01
Supplement: d3gc04644c1.pdf [file d3gc04644c1.pdf]

## Supporting information for

# Fabricating CdS/Ag/BiVO<sub>4</sub> Z-heterojunction for solvent-free photocatalytic oxidation of amines

Ting Zhang,<sup>a</sup> Weitao Wang,<sup>a,\*</sup> Xulu Jiang, Huan Wang,<sup>a</sup> Zhen-Hong He,<sup>a</sup> Yang Yang,<sup>a</sup> Kuan Wang,<sup>a</sup> Zhao-Tie Liu<sup>\*,a,b</sup> and Buxing Han<sup>\*,c</sup>

<sup>a</sup> Shaanxi Key Laboratory of Chemical Additives for Industry, College of Chemistry and Chemical Engineering, Shaanxi University of Science & Technology, Xi'an 710021, China.

<sup>b</sup> School of Chemistry & Chemical Engineering, Shaanxi Normal University, Xi'an 710119, China.

<sup>c</sup> Beijing National Laboratory for Molecular Sciences, CAS Key Laboratory of Colloid and Interface and Thermodynamics, Center for Carbon Neutral Chemistry, Institute of Chemistry, Chinese Academy of Sciences, Beijing 100190, China.

\*E-mails: wangweitao@sust.edu.cn (W. Wang), ztliu@snnu.edu.cn (Z.-T. Liu), hanbx@iccas.ac.cn (B. Han)

## 1. Chemicals and reagents

Benzylamine (99.0%), acetonitrile (99.0%, GC), and 1,4-benzoquinone (99%) were purchased from Aladdin Industrial Corporation, China. Bismuth nitrate pentahydrate (Bi(NO<sub>3</sub>)<sub>3</sub>•5H<sub>2</sub>O, 99.0%), ammonium metavanadate (99%), HNO<sub>3</sub> aqueous solution (65-68%), ammonium hydroxide (25%), ethanethioamide (99.0%), nitric acid, ethanol (99.5%), and ammonium oxalate were obtained from the Sinopharm Chemical Reagent Co., Ltd (Shanghai, China). All of the reagents were used as received without further purification.

## 2. Tables

**Table S1** Photocatalytic oxidation of benzylamine to N-benzylidenebenzylamine with different catalysts in different conditions.

| Catalysts                                         | Light                | Solvents                                | atmosphere     | BA (mmol) | Time (h) | Conv. (%) | Sel. (%) | Fr. ( $\mu\text{mol}\cdot\text{g}^{-1}\cdot\text{h}^{-1}$ ) | Ref.      |
|---------------------------------------------------|----------------------|-----------------------------------------|----------------|-----------|----------|-----------|----------|-------------------------------------------------------------|-----------|
| CdS/Ag/BiVO <sub>4</sub>                          | 10 W LED, 400-405 nm | -                                       | O <sub>2</sub> | 5         | 12       | 73.5      | 99       | 6117                                                        | This work |
| CdS/Ag/BiVO <sub>4</sub>                          | 10 W LED, 400-405 nm | -                                       | O <sub>2</sub> | 5         | 24       | 92.0      | 99       | 4185                                                        | This work |
| Au/TiO <sub>2</sub>                               | 250 W Halogen        | -                                       | air            | 30        | 24       | 12.5      | 99       | 5053                                                        | 1         |
| Bi-Ellagate MOF                                   | 400 W Halogen        | -                                       | air            | 0.5       | 24       | 96        | 99       | 4000                                                        | 2         |
| CdS@MIL-101                                       | 300W Xe lamp, 420 nm | Toluene                                 | air            | 0.1       | 10       | 93        | 99       | 196                                                         | 3         |
| Q-BiVO <sub>4</sub>                               | 300W Xe lamp, 420 nm | Acetonitrile                            | O <sub>2</sub> | 0.1       | 4        | 98.3      | 98.7     | 2426                                                        | 4         |
| PdS/CdS/MoS <sub>2</sub>                          | 300W Xe lamp, 420 nm | N, N-dimethylformamide/H <sub>2</sub> O | air            | 0.5       | 10       | 87        | 99       | 21533                                                       | 5         |
| BiOCl                                             | 300W Xe lamp, 420 nm | N, N-dimethylformamide                  | O <sub>2</sub> | 0.09      | 1        | 99        | 99       | 8648                                                        | 6         |
| CeO <sub>2</sub> /g-C <sub>3</sub> N <sub>4</sub> | 300W Xe lamp, 420 nm | Acetonitrile                            | O <sub>2</sub> | 0.9       | 5        | 82.2      | 99       | 3114                                                        | 7         |
| g-C <sub>3</sub> N <sub>4</sub> /TiO <sub>2</sub> | 300W Xe lamp, 420 nm | Acetonitrile                            | O <sub>2</sub> | 1         | 3        | 91        | 99       | 7673                                                        | 8         |
| Ni/CdS                                            | 300W Xe lamp, 420 nm | Acetonitrile/Water                      | N <sub>2</sub> | 0.5       | 2        | 99        | 97       | 24008                                                       | 9         |

**Table S2** Textural properties of the catalysts.

| Catalyst                 | BET surface area (m <sup>2</sup> /g) | BJH pore cumulative volume (cm <sup>3</sup> /g) | BJH adsorption average pore diameter (nm) |
|--------------------------|--------------------------------------|-------------------------------------------------|-------------------------------------------|
| CdS                      | 39                                   | 0.2                                             | 26.0                                      |
| BiVO <sub>4</sub>        | 7                                    | 0.02                                            | 13.2                                      |
| Ag/BiVO <sub>4</sub>     | 12                                   | 0.1                                             | 36.1                                      |
| CdS/Ag/BiVO <sub>4</sub> | 25                                   | 0.15                                            | 23.4                                      |

**Table S3** Comparison of EATOS parameters in literature for the photocatalytic synthesis of benzylamine to N-benzylidenebenzylamine.

| EATOS parameters                | This work       |                  | Ref.1           |                  | Ref.3           |                  | Ref.4           |                  | Ref.6           |                  |
|---------------------------------|-----------------|------------------|-----------------|------------------|-----------------|------------------|-----------------|------------------|-----------------|------------------|
|                                 | E <sub>in</sub> | E <sub>out</sub> |
| Solvents                        | -               | -                | -               | -                | 0.19            | 0.19             | 0.17            | 0.17             | 0.55            | 0.55             |
| Substrates                      | 1.6             | -                | 9.5             | -                | 1.27            | -                | 1.23            | -                | 1.21            | 0.01             |
| Auxiliary materials (isolation) | -               | -                | -               | -                | 0.77            | 0.77             | 0.75            | 0.75             | 1.94            | 1.94             |
| By-products                     | -               | 0.4              | -               | 8.4              | -               | 0.09             | -               | 0.05             | -               | 0.02             |
| Coupled products                | -               | 0.2              | -               | 0.1              | -               | 0.18             | -               | 0.18             | -               | 0.18             |
| Total value of parameters       | 1.6             | 0.6              | 9.5             | 8.5              | 2.23            | 1.23             | 2.15            | 1.15             | 3.70            | 2.70             |

Environmental Assessment Tool for Organic Syntheses (EATOS), the software can be obtained free of charge via <http://www.metzger.chemie.uni-oldenburg.de/eatos/>. The data provided in the literature was not comprehensive, such as auxiliary materials, byproducts, sewage, therefore water and ammonia were uniformly taken as coupled product and their quantity was recorded as 0 kg. Assume that the reaction gases were all oxygen and the by-products were ignored. In addition, compared with the solvent-free system, the solvent system needs to separate the solvent from the product (the environmental impact of the separation of the catalyst from the reaction liquid is not considered). According to the literature, one liter of water was required for every 300 mL of reaction liquid separation. Since the volume of the substrate was small (compared with the solvent), the volume of the substrate itself was ignored when calculating the volume of water required for separation. Therefore, the parameters required for calculation are shown in Table S3. Although Ref.1 was a solvent-free system, the substrate quantity was large (30 mmol) and the yield was low (12.5%) under solvent-free conditions, resulting in the large values of E<sub>in</sub> and E<sub>out</sub>.

**Table S4** Parameter values in the calculation process for the photocatalytic synthesis of benzylamine to N-benzylidenebenzylamine.

| Ref.      | Substrates/mol                                |                | Catalyst /g | Solvents/mL                 | Auxiliary materials (isolation) | Coupled products/mol |                 |
|-----------|-----------------------------------------------|----------------|-------------|-----------------------------|---------------------------------|----------------------|-----------------|
|           | C <sub>7</sub> H <sub>9</sub> N (benzylamine) | O <sub>2</sub> |             |                             |                                 | H <sub>2</sub> O     | NH <sub>3</sub> |
| This work | 5                                             | 1.5            | 0.05        | -                           | -                               | 0                    | 0               |
| 1         | 30                                            | 7.5            | 0.03        | -                           | -                               | 0                    | 0               |
| 3         | 0.1                                           | 0.025          | 0.05        | Toluene 2 mL                | 7 mL                            | 0                    | 0               |
| 4         | 0.1                                           | 0.025          | 0.01        | Acetonitrile 2 mL           | 7 mL                            | 0                    | 0               |
| 6         | 0.09                                          | 0.025          | 0.01        | N, N-dimethylformamide 5 mL | 16.7 mL                         | 0                    | 0               |

### 3. Figures

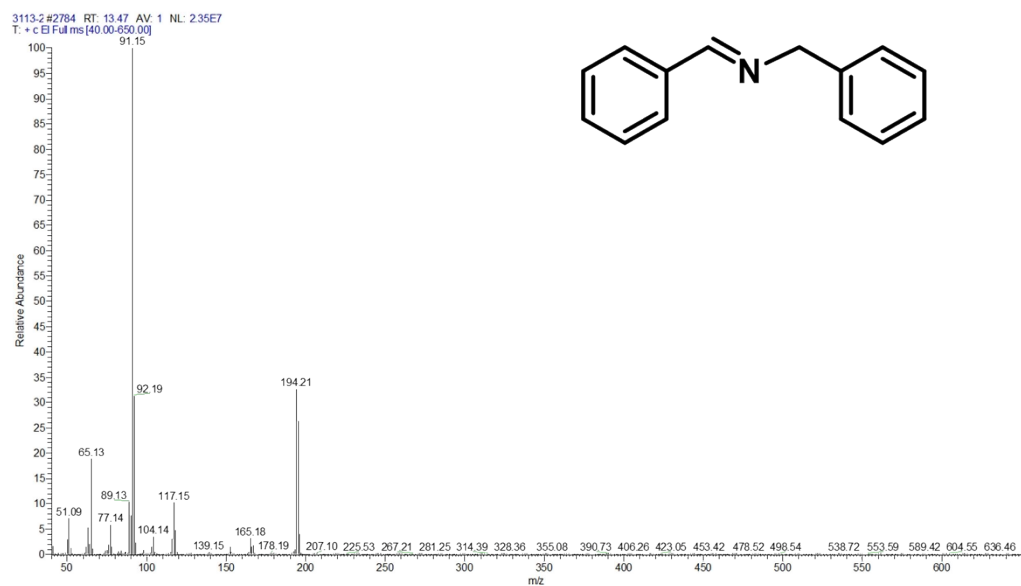

**Fig. S1** GC-MS of product.

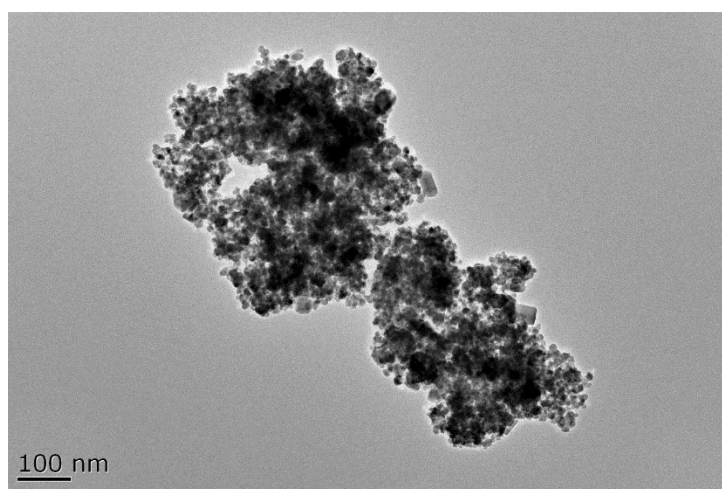

**Fig. S2** Low-resolution electron microscopy images.

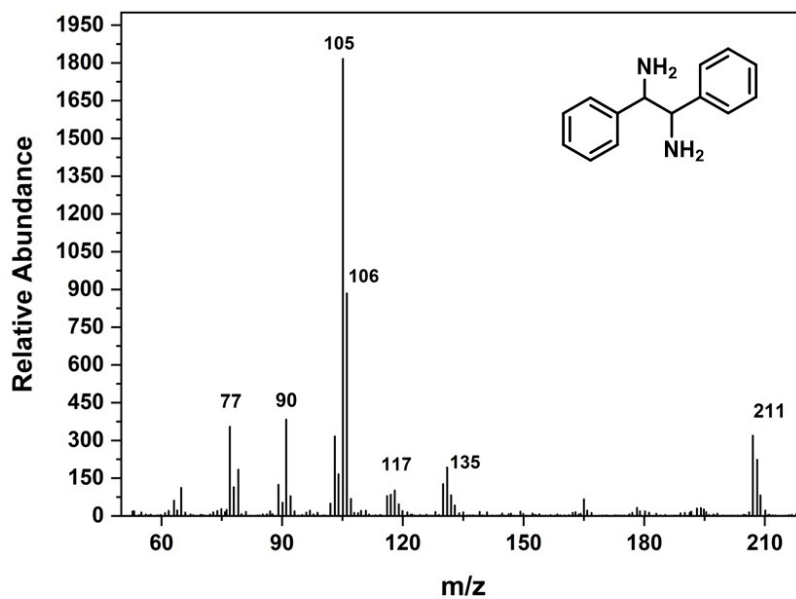

Fig. S3 GC-MS of byproduct.

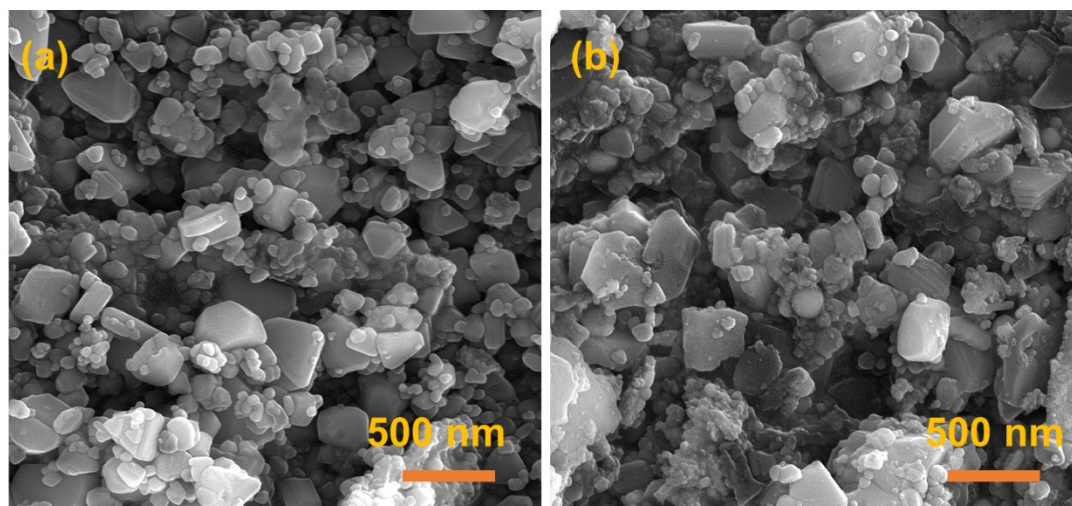

Fig. S4 SEM images of fresh and used catalyst.

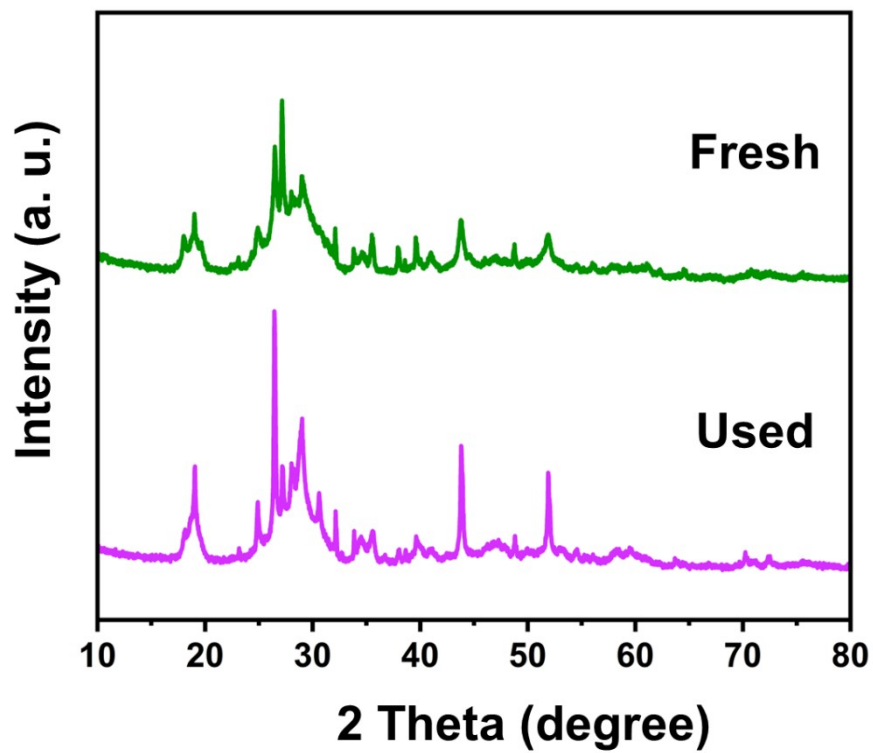

Fig. S5 XRD patterns of fresh and used catalyst.

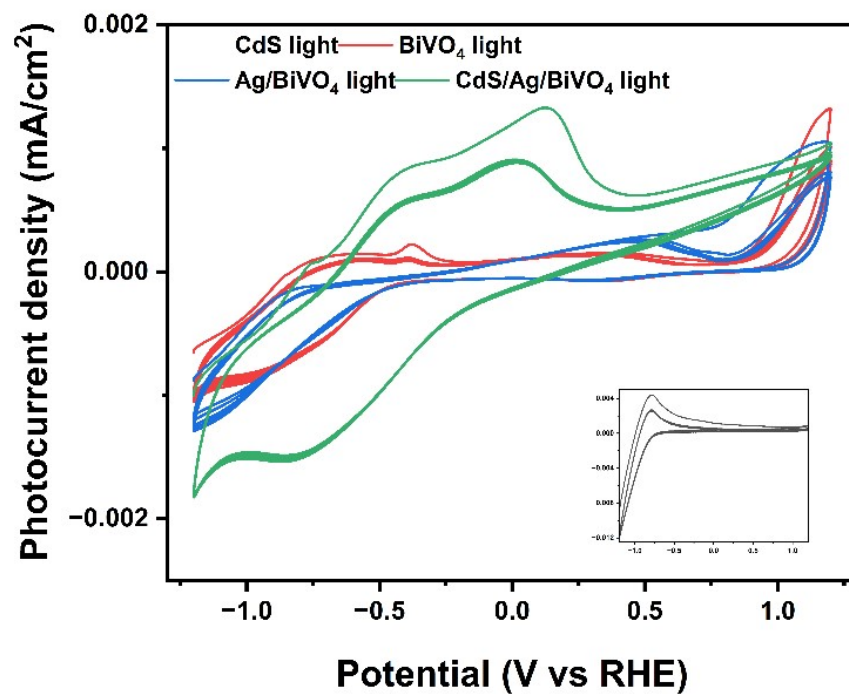

Fig. S6 Cyclic voltammetry curve (CV) of catalysts.

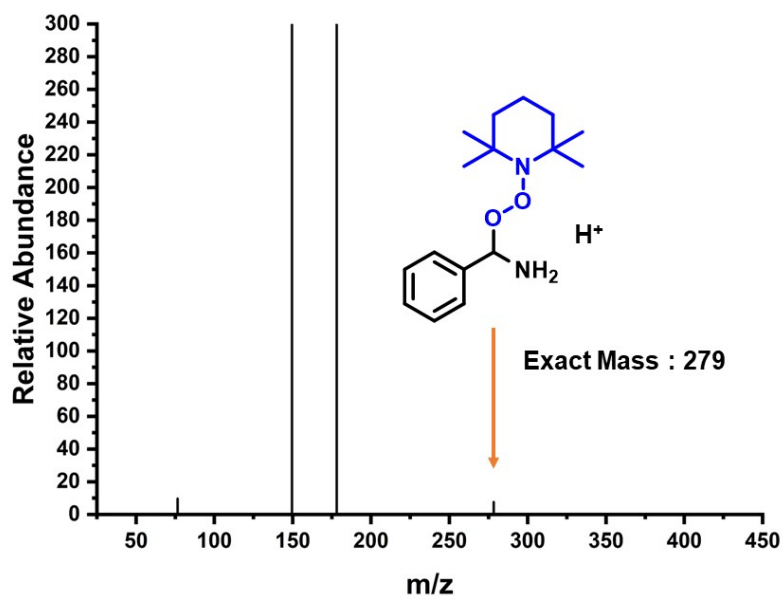

**Fig. S7** Mechanistic experiments (Reaction condition: 5 mmol benzylamine, 1 mmol TEMPO, 50 mg catalyst, 1 atm O<sub>2</sub>, room temperature, LED 10 W,  $\lambda = 400\text{-}405$  nm, 1 h).

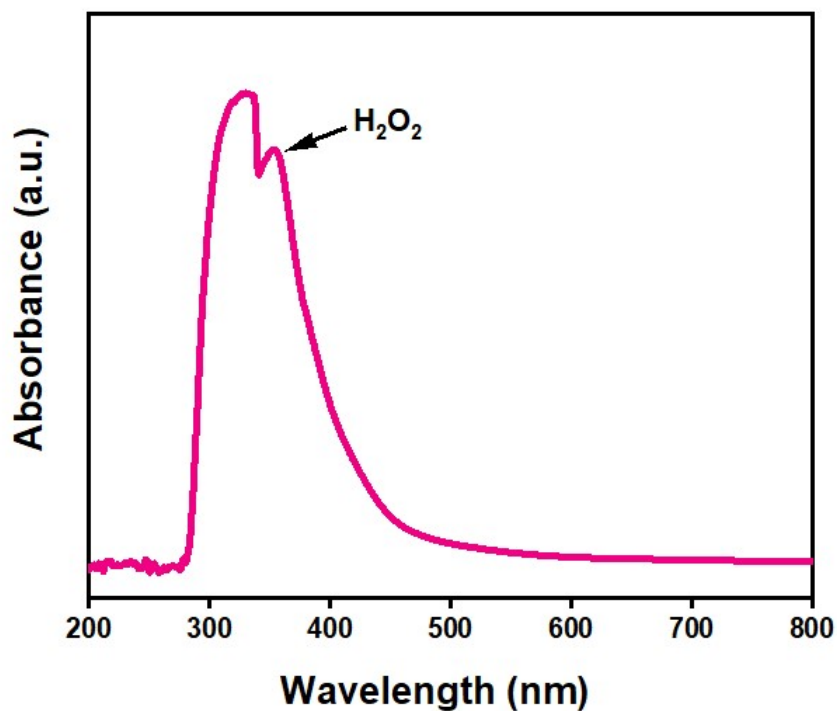

**Fig. S8** UV-vis absorption spectrum for detecting the existence of H<sub>2</sub>O<sub>2</sub> by using CAB as a catalyst.



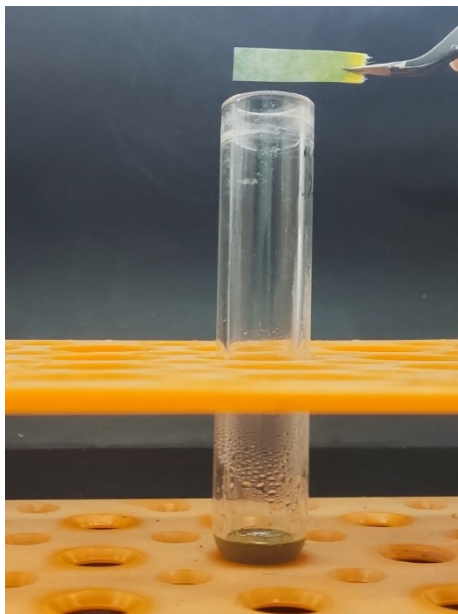

**Fig. S9** The pH test paper for testing the production of NH<sub>3</sub>.

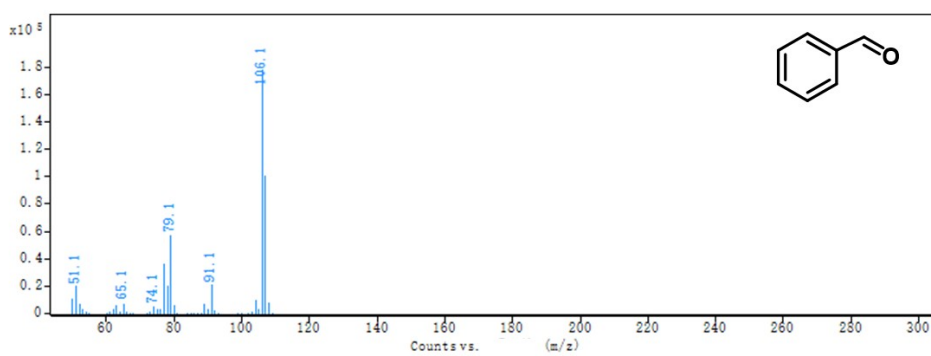

**Fig. S10** GC-MS of benzaldehyde.

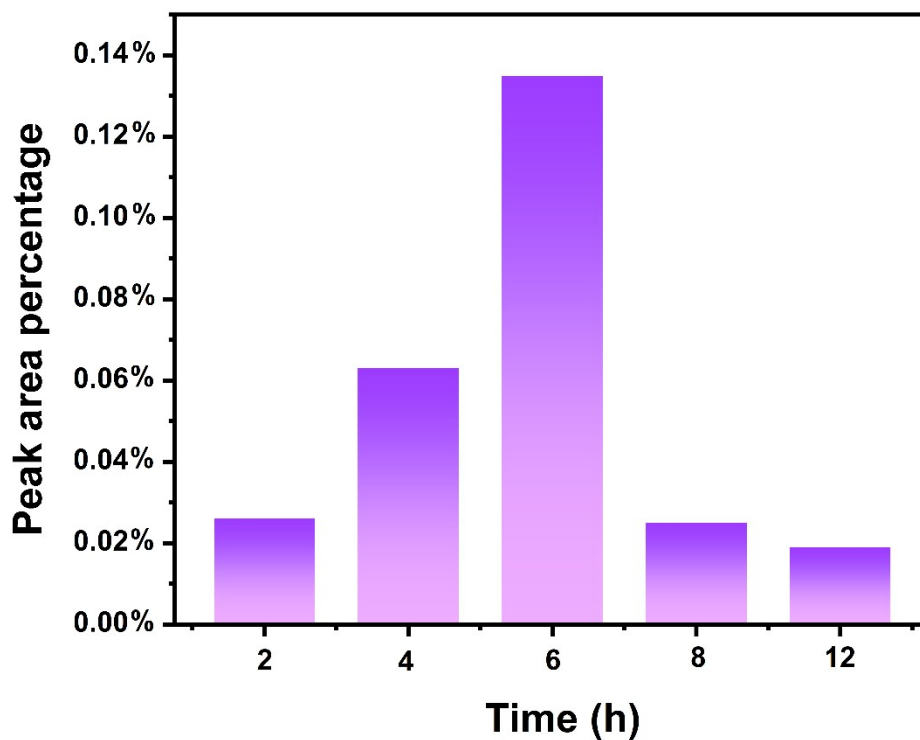

**Fig. S11** Peak area percentage of benzaldehyde to internal standard. The Y axis was the peak area ratio of benzaldehyde to the internal standard due to the trace amount of benzaldehyde could not be determined quantitatively. It can be found the amount of benzaldehyde was increased and then decreased with the highest content at 6 h, indicating that benzaldehyde was the intermediate compounds during the reaction.

**Fig. S12-S22 The MS for the products in Table 2.**

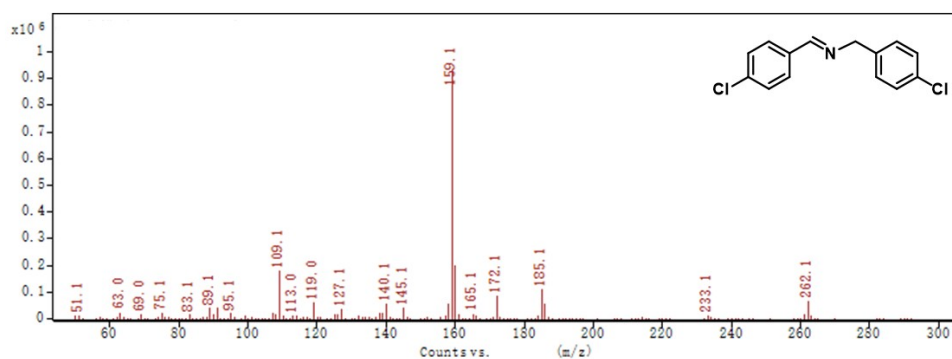

**Fig. S12** GC-MS of product in substrate extension entry 1.

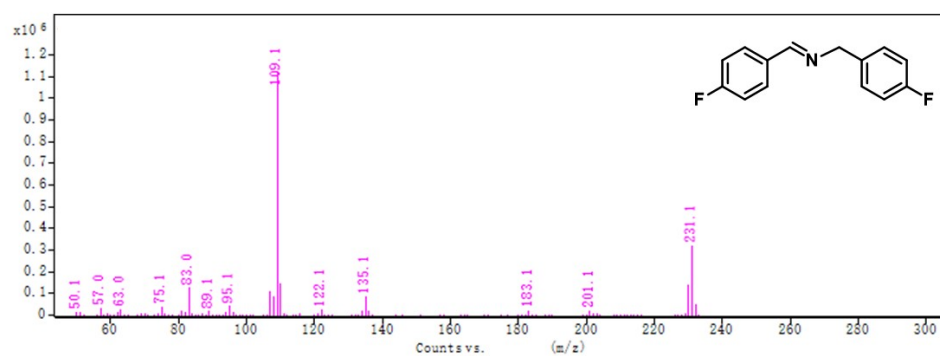

**Fig. S13** GC-MS of product in substrate extension entry 2.

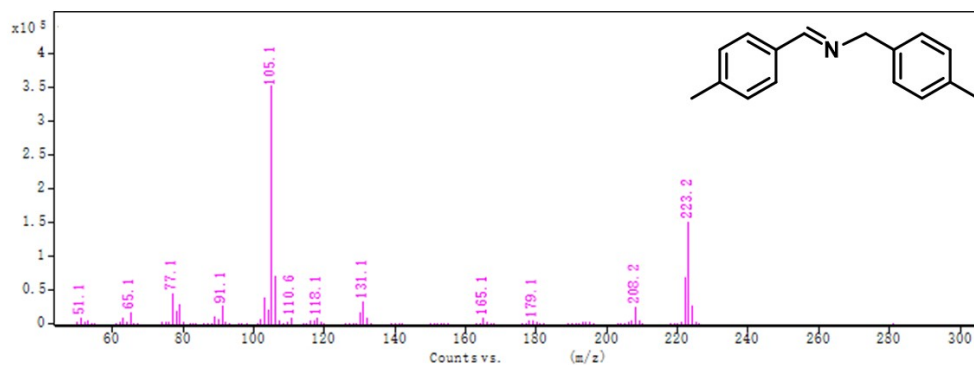

**Fig. S14** GC-MS of product in substrate extension entry 3.

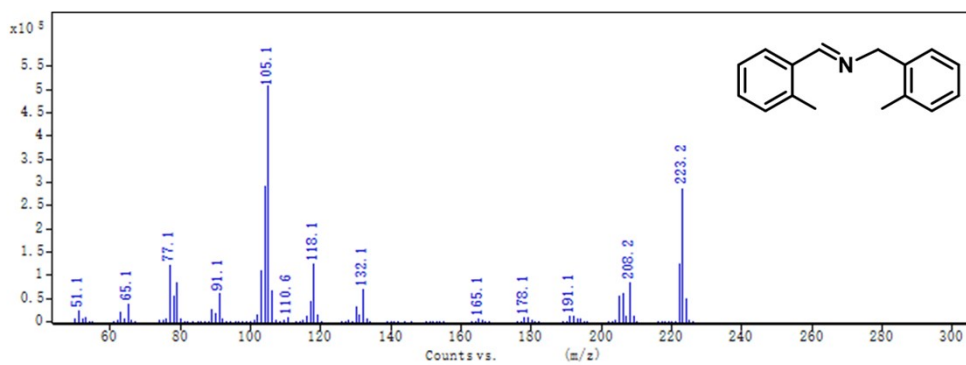

**Fig. S15** GC-MS of product in substrate extension entry 4.

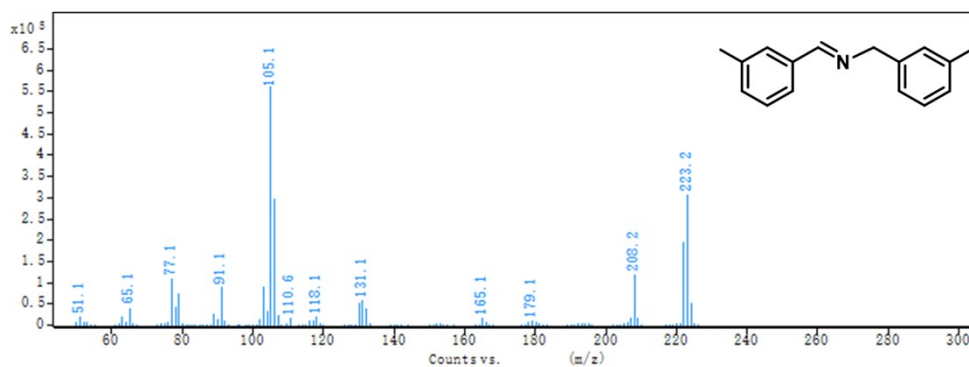

**Fig. S16** GC-MS of product in substrate extension entry 5.

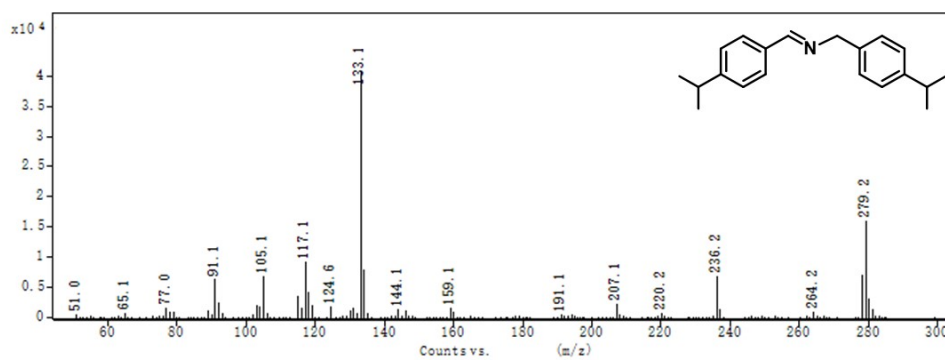

**Fig. S17** GC-MS of product in substrate extension entry 6.

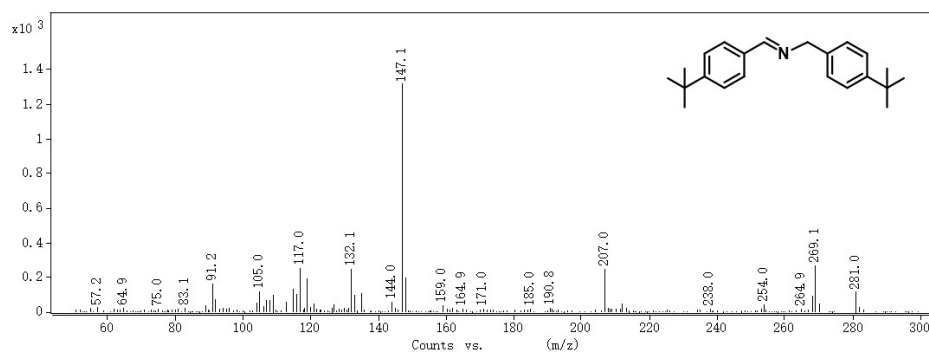

**Fig. S18** GC-MS of product in substrate extension entry 7.

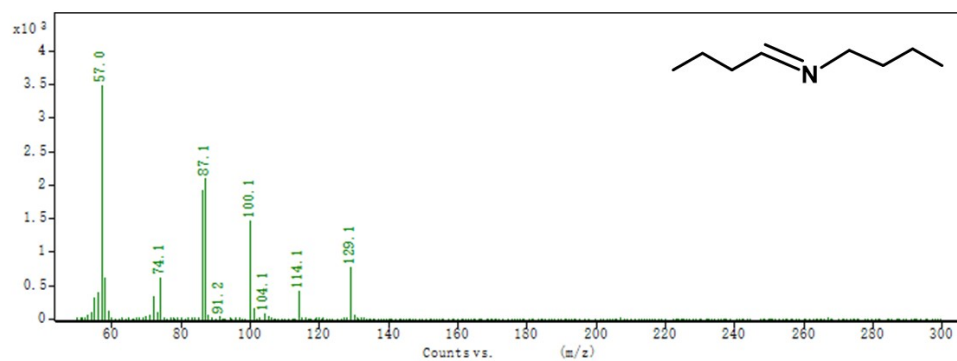

**Fig. S19** GC-MS of product in substrate extension entry 8.

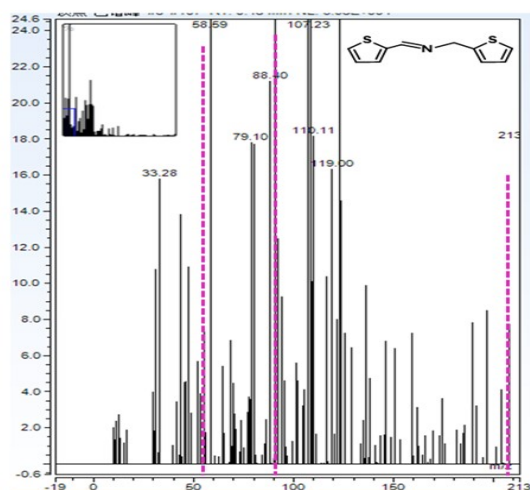

**Fig. S20** LC-MS of product in substrate extension entry 9.

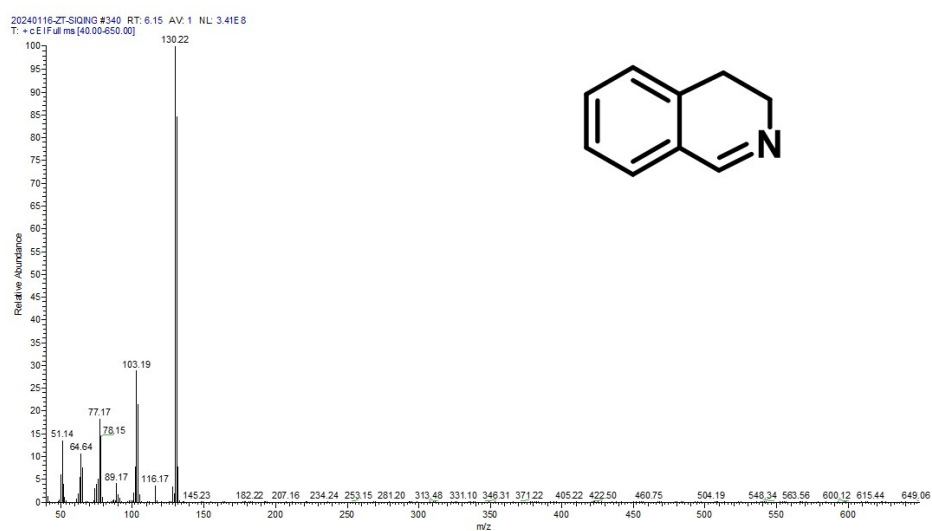

**Fig. S21** GC-MS of product in substrate extension entry 10.

20240116-ZTYIAN-2 #90 RT: 5.30 AV: 1 NL: 5.32E6  
T: -c-ElFulms [40.00-500.00]

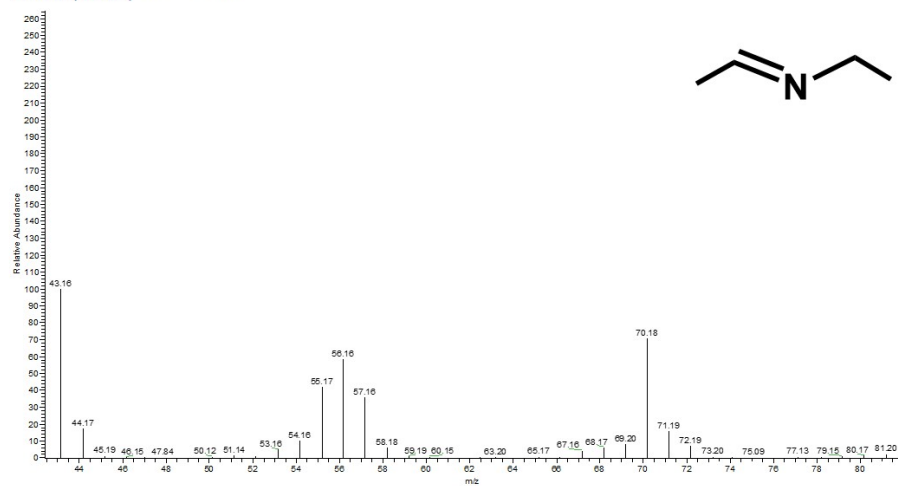

**Fig. S22** GC-MS of product in substrate extension entry 11.

## Reference

- [1] J. L. Yang, C.-Y. Mou, *Appl. Catal. B*, 2018, **231**, 283-291.
- [2] R. H. Alzard, L. A. Siddig, A. S. Abdelhamid, A. Alzamy, *ACS Omega*, 2022, **7**, 36689-36696.
- [3] R. Wu, S. K. Wang, Y. Zhou, J. L. Long, F. Dong, W. Zhang, *ACS Appl. Nano Mater.*, 2019, **2**, 6818.
  
- [4] M. Lv, F. X. Tong, Z. Y. Wang, Y. Y. Liu, P. Wang, H. F. Cheng, Y. Dai, Z. K. Zheng, B. B. Huang, *J. Mater. Chem., A* 2022, **10**, 19699-19709.
- [5] Sun, B. S. Zheng, J. H. D. W. Yin, H. L. Jin, X. Wang, Q. L. Xu, A. Liu, S. Wang, *Appl. Surf. Sci.*, 2022, **592**, 153277.
- [6] B. X. Zhang, J. L. Zhang, R. Duan, Q. Wan, X. N. Tan, Z.-Z. Su, B. X. Han, L. R. Zheng, G. Mo, *Nano Energy*, 2020, **78**, 105340.
- [7] Y. Y. Chai, L. Zhang, Q. Q. Liu, F. L. Yang, W.-L. Dai, *ACS Sustain. Chem. Eng.*, 2018, **6**, 10526-10535.
- [8] M. Chandra, U. Guharoy, D. Pradhan, *ACS Appl. Mater. Interfaces.*, 2022, **14**, 22122-22137.
- [9] W. W. Yu, D. Zhang, X. W. Guo, C. S. Song, Z. K. Zhao, *Catal. Sci. Technol.*, 2018, **8**, 5148-5154.
